# Supplementary material
Source: PubMed Central journal article supplement (PMC4207654)
Supplement: NIHMS633857-supplement-01.pdf [file NIHMS633857-supplement-01.pdf]

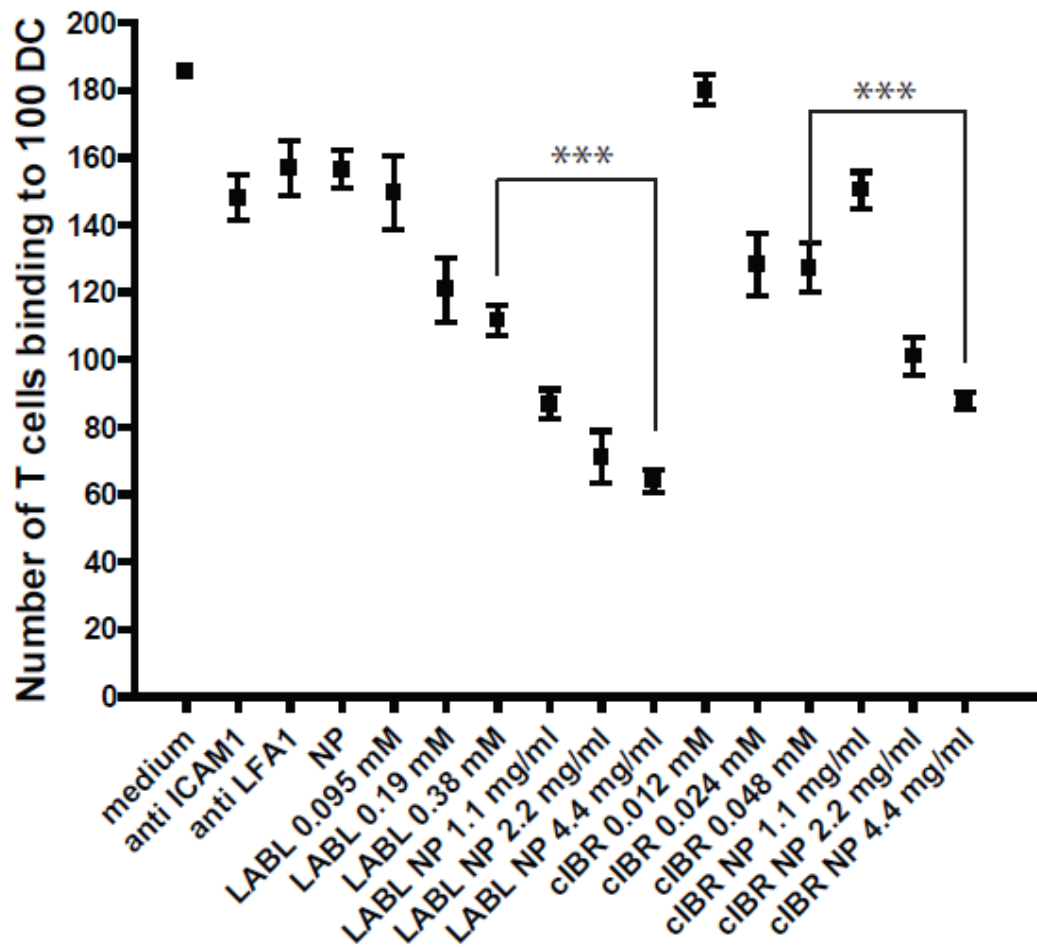

**Supplementary figure 1.** Blocking of the T cell conjugation to DCs. LABL-NPs and cIBR-NPs inhibited the binding of T cells to DCs to a much greater extent than free LABL and cIBR peptides. DCs were incubated with samples for 30 min, washed and cocultured with T cells for 2 hours. T cells and DCs were imaged and counted. \*\*\* indicates  $p < 0.001$ .
